# Supplementary material for: Application of liquid biopsy-based targeted capture sequencing analysis to improve the precision treatment of non-small cell lung cancer by tyrosine kinase inhibitors
Source: PubMed Central journal article supplement — BMJ Open Respir Res. 2022 Jan 28;9(1):e001154. doi: 10.1136/bmjresp-2021-001154 (PMC8804681; doi:10.1136/bmjresp-2021-001154), 2022-01-28
Supplement: bmjresp-2021-001154supp001.pdf [file bmjresp-2021-001154supp001.pdf]

1    **Application of liquid biopsy-based targeted capture sequencing analysis to improve**  
2    **the precision treatment of non-small cell lung cancer by tyrosine kinase inhibitors**

3

4    Lei Zhang<sup>1,2</sup>, John Coffin<sup>1</sup>, Kim Formenti<sup>1</sup>, Quincy Chu<sup>2</sup>, Iyare Izevbaye<sup>1\*</sup>

5    <sup>1</sup>Department of Laboratory Medicine and Pathology, University of Alberta

6    <sup>2</sup>Cross Cancer Institute, Alberta Health Services

7

8

9

10    \***Corresponding author:** Dr. Iyare Izevbaye, 4B1.21 Walter C MacKenzie Health  
11    Sciences Centre, Department of Laboratory Medicine and Pathology, University of  
12    Alberta, Edmonton, Alberta, T6G 2B7, Canada. E-mail address: izevbaye@ualberta.ca

13

14

15

16

17

18

19

20

21

22

23

24

## 25 **Appendix S1-Methods**

### 26 **Testing *EGFR* variants in cfDNA by qPCR**

27 Cobas *EGFR* Mutation Test v2 (Roche Diagnostics, QC, Canada) a real-time  
28 qPCR-based assay, was used for testing *EGFR* variants in plasma cfDNA from NSCLC  
29 patients. It is an in vitro diagnostic product that detects known mutations in the exons 18,  
30 19, 20, and 21 of *EGFR* through PCR amplification. The Cobas cfDNA Sample  
31 Preparation Kit (Roche Diagnostics) was used for the extraction of cfDNA from 2 mL  
32 plasma samples. Briefly, plasma samples were treated with a mixture of protease K and  
33 lysis/binding buffer for releasing cfDNA. After binding to the glass fiber filter, cfDNA  
34 was purified through the serial of washing steps by using the provided washing buffer.  
35 Plasma cfDNA was then collected into the provided elution buffer. The extracted plasma  
36 cfDNA was used for *EGFR* testing by the Cobas *EGFR* Mutation Test kit v2 (Roche  
37 Diagnostics). Three qPCR amplification detection systems were prepared for separately  
38 testing different *EGFR* variants present in one plasma cfDNA sample. Following the  
39 manufacturer's instructions, the qPCR detection of target *EGFR* variants in cfDNA was  
40 performed on the Cobas z 480 analyzer (Roche Diagnostics).

### 41 **Testing pan-cancer gene mutations in cfDNA by NGS**

42 AVENIO ctDNA expanded kit (Roche Diagnostics) that includes the reagents for  
43 sequencing test and the post-sequencing analysis software was used for testing somatic  
44 mutations in the cfDNA of NSCLC patients. The AVENIO ctDNA expanded kit (Roche  
45 Diagnostics) is a hybridization capture sequencing-based 77 genes pan-cancer assay, and  
46 target tumour biomarker genes covered by the panel are listed in table S1.

47 AVENIO cfDNA Isolation Kit (Roche Diagnostics) was used to extract cfDNA  
48 from plasma according to the user's manual. With a high pure extender assembly (HPEA)

49 unit, the cfDNA extraction kit was used to isolate cfDNA from 4 mL (2-5 mL) plasma  
50 samples. The quality of extracted plasma cfDNA samples was checked before library  
51 preparation. Agilent High Sensitivity DNA Analysis Kit (Agilent Technologies, CA,  
52 USA) was used to determine the length distributions of different cfDNA fragments for  
53 assessing the genomic DNA contamination. The concentration of cfDNA was also tested  
54 by using the Qubit® dsDNA HS Assay Kit on the Qubit 3.0 fluorometer (ThermoFisher  
55 Scientific, CA, USA).

56       After cfDNA extraction, the AVENIO ctDNA Expanded Kit (Roche Diagnostics)  
57 was used to prepare the sequencing library based on a hybridization capture-based  
58 technology. Briefly, with 10-50 ng input of cfDNA, the first step was adapter ligation.  
59 After post-ligation cleanup, PCR was performed to amplify the adapter-ligated cfDNA  
60 template. Hybridization was performed by using biotin-labeled probes to specifically  
61 capture the target genes fragments which were then enriched through binding to  
62 streptavidin beads. The expanded panel included in this kit was used for identifying and  
63 characterizing 77 genes (e.g. *BRAF*, *EGFR*, *PIK3CA*, *et al.*) that are associated with solid  
64 tumors (Table S1). After post-hybridization washes, a second PCR was performed to  
65 amplify the enriched library. The quality of the enriched library was assessed again by  
66 the Agilent High Sensitivity DNA Analysis Kit (Agilent Technologies) and the Qubit®  
67 dsDNA HS Assay Kit on the Qubit 3.0 fluorometer (ThermoFisher Scientific). With 50  
68 ng input cfDNA, the typical concentration of enriched library is expected from 0.5 ng/μL  
69 to 30 ng/μL. The ideal peak size of the library is approximately 300 bp in the Bioanalyzer  
70 detection profile.

71 Prepared libraries were sequenced on the NextSeq 500 500/550 High Output Kit  
72 V2 (300 cycles) on Illumina NextSeq sequencing platform according to manufacturer's  
73 instructions, (Illumina, CA, USA). A 15% PhiX Sequencing Control V3 (Illumina) pike-  
74 in sequencing control was included. AVENIO ctDNA Analysis Software (Roche  
75 Diagnostics) was used for sequencing data analysis and generating diagnostic reports.  
76 Specifically, the AVENIO ctDNA Analysis Software uses integrated digital error  
77 suppression (iDES) strategies, combining molecular bar codes within silico error  
78 suppression techniques to call variants (1). According to the manufacture's introduction,  
79 the limit of detection of this kit has been estimated to reach down to 0.1%, and it has also  
80 been reported that the sequencing kit can detect mutant allele fraction down to 0.02% (2),  
81 which is consistent with the results from this study. By using the high-quality control  
82 process that is the iDES strategies, combining molecular bar codes within silico error  
83 suppression techniques, there is no cut-off value available for different called gene  
84 variants. The mutant allele fraction that is lower than 0.1% can still be reported with high  
85 confidence. The run metrics of this study are shown in figure S2 and table S2.

#### 86 **Testing *EGFR* mutations in cfDNA by MassArray**

87 The MassARRAY detection system is based on matrix-assisted laser  
88 desorption/ionization time-of-flight mass spectrometry (MALDI-TOF-MS) technology, It  
89 is a sensitive method for testing low allele frequency biomarker gene variants (3). A  
90 clinically validated UltraSEEK Lung Cancer Panel (Agena Bioscience, CA, USA) was  
91 the reference method in this study.

92 QIAamp Circulating Nucleic Acid Kit (Qiagen, CA, USA) was used for plasma  
93 cfDNA extraction. Briefly, purified cfDNA from 4 mL of plasma samples were prepared

94 through four steps (lysis, binding, washing, and elution) of extraction procedures. The  
95 Qubit® dsDNA HS Assay Kit (ThermoFisher Scientific) was used for testing the  
96 concentration of extracted plasma cfDNA. Using 10 ng input cfDNA, a multiplex PCR  
97 was performed to amplify target genes in cfDNA, and followed by a mutation-specific  
98 single based extension reaction for the MassArray UltraSEEK Lung Cancer Panel (Agena  
99 Bioscience), according to the manufacturer's instructions. The extension products were  
100 enriched through a streptavidin-biotin interaction-based hybridization capture process and  
101 then transferred to a SpectroCHIP Array (Agena Bioscience) for the following detection  
102 through the MassArray Analyzer (Agena Bioscience). Generally, the enriched extension  
103 products (DNA sequences) were ionized and accelerated into a flight tube towards a  
104 detector. The extended probes were separated based on the differences of time-of-flight  
105 needed, and a mass spectrum for each sample was generated with relative intensity on the  
106 y-axis and mass/charge on the x-axis. The acquired data were further processed by the  
107 MassARRAY Typer (Agena Bioscience) software for generating a detailed detection  
108 report of the detected gene variants.

109 **Appendix S2-Figures and tables**

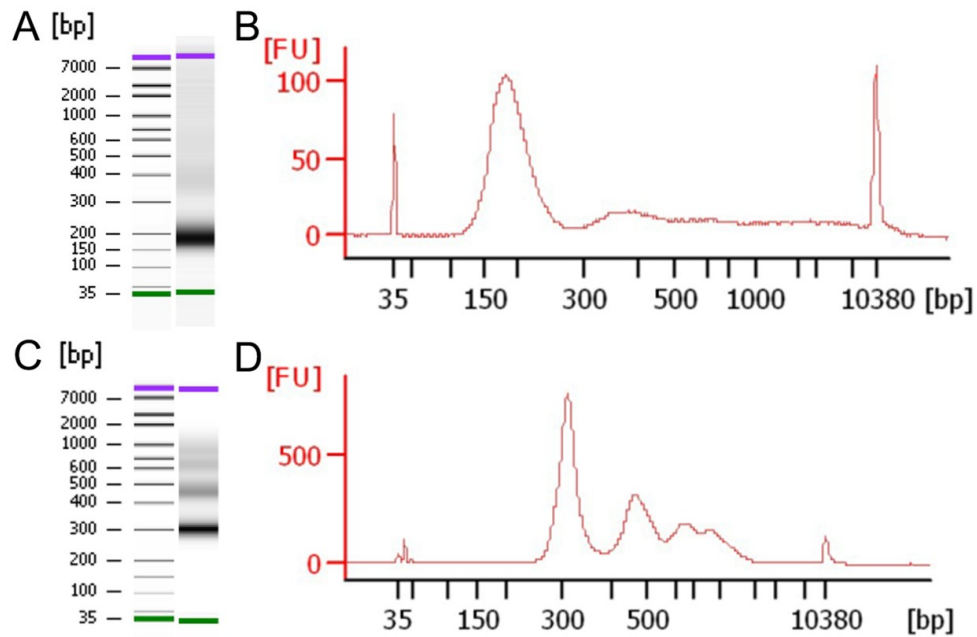

110

111 Figure S1. Electrophoresis files of typical good quality cfDNA (A, B) and enriched

112 library (C, D) tested by the high-sensitivity DNA assay of Agilent Bioanalyzer.

113

114

115

116

117

118

119

120

121

122

123

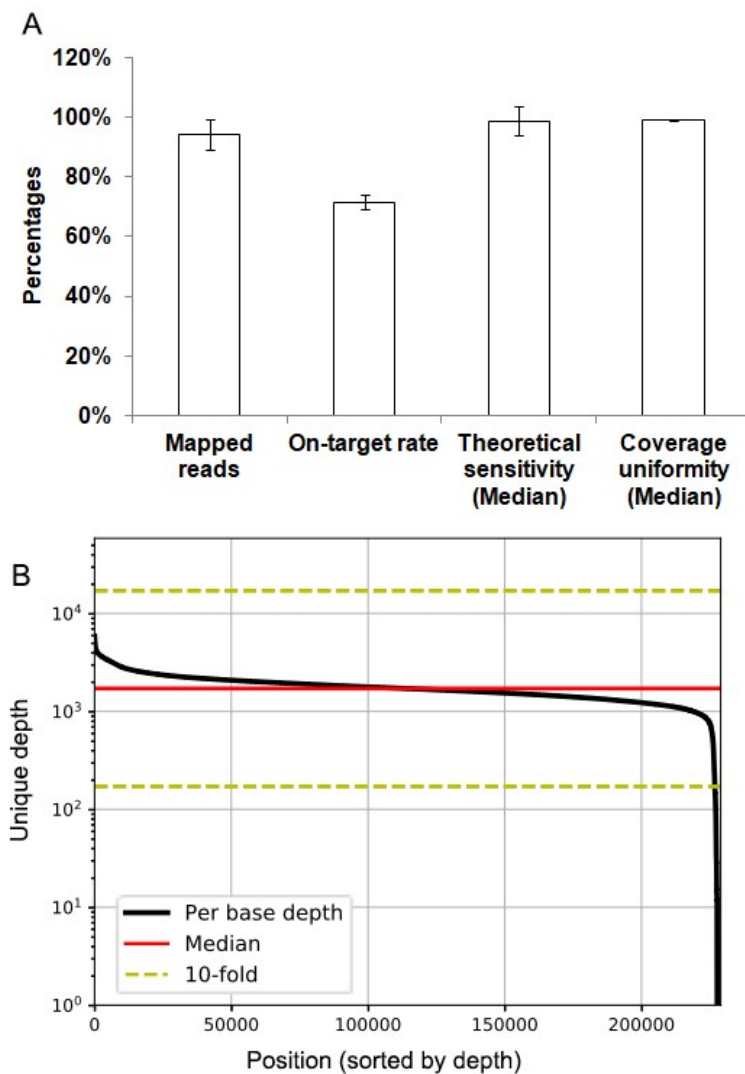

124

125 Figure S2. Performance of testing tumour biomarkers in cfDNA by NGS-based Avenio  
126 expanded panel. A: Average of the total mapped reads, on-target rate, theoretical  
127 sensitivity and coverage uniformity of the NGS assay for testing plasma cfDNA samples.

128 B: Typical coverage uniformity for each base of the cfDNA tested by the NGS assay.

129

130

131 Table S1. Target tumour biomarker genes covered by the Avenio Expand Panel

| List of target genes                                                                                                                                                                                                                                                                                                                                                                                                                    |
|-----------------------------------------------------------------------------------------------------------------------------------------------------------------------------------------------------------------------------------------------------------------------------------------------------------------------------------------------------------------------------------------------------------------------------------------|
| <i>ABL1 AKT1 AKT2 ALK APC AR ARAF BRAF BRCA1 BRCA2 CCND1 CCND2 CCND3 CD274 CDK4 CDK6 CDKN2A CSF1R CTNNA1 DDR2 DPYD EGFR ERBB2 ESR1 EZH2 FBXW7 FGFR1 FGFR2 FGFR3 FLT1 FLT3 FLT4 GATA3 GNA11 GNAQ GNAS IDH1 IDH2 JAK2 JAK3 KDR KEAP1 KIT KRAS MAP2K1 MAP2K2 MET MLH1 MSH2 MSH6 MTOR NF2 NFE2L2 NRAS NTRK1 PDCD1LG2 PDGFRA PDGFRB PIK3CA PIK3R1 PMS2 PTCH1 PTEN RAF1 RBI RET RNF43 ROS1 SMAD4 SMO STK11 TERT TP53 TSC1 TSC2 UGT1A1 VHL</i> |

132

133 Table S2. The metrics of testing tumour biomarker genes in cfDNA by the Avenio panel

|                    | Number of read pairs (M) | Sequencing depth (Median) | Unique depth (Median) | Error rate | Fragment length (bp) (Median) |
|--------------------|--------------------------|---------------------------|-----------------------|------------|-------------------------------|
| Average            | 25                       | 9004                      | 2870                  | 1.14E-05   | 175                           |
| Standard Deviation | 5                        | 1543                      | 1094                  | 5.33E-06   | 6                             |

134

135 Table S3. Results of testing *EGFR* from plasma cfDNA by NGS, MassARRAY and  
136 qPCR methods

| Mutations                           | Variants        | NGS-based Avenio Expanded Panel | MassARRAY-based UltraSEEK Lung Panel | qPCR-based Cobas <i>EGFR</i> Mutation Test |
|-------------------------------------|-----------------|---------------------------------|--------------------------------------|--------------------------------------------|
| <i>EGFR</i> sensitizing mutations   | Exon 18 p.G719A | 4.2% (1/24)                     | 4.3% (1/23)                          | 8.3% (1/12)                                |
|                                     | Exon 20 p.S768I | 4.2% (1/24)                     | 4.3% (1/23)                          | 8.3% (1/12)                                |
|                                     | Exon 21 p.L858R | 20.8% (5/24)                    | 17.4% (4/23)                         | 16.7% (2/12)                               |
|                                     | Exon 21 p.L861Q | 8.3% (2/24)                     | 8.7% (2/23)                          | 8.3% (1/12)                                |
|                                     | Exon 19 Dels    | 33.3% (8/24)                    | 26.1% (6/23)                         | 41.7% (5/12)                               |
| TKIs resistant <i>EGFR</i> mutation | Exon 20 p.T790M | 33.3% (8/24)                    | 34.8% (8/23)                         | 25.0% (3/12)                               |

137

138

139

140



141 Table S4. List of *EGFR* variants showed mismatched testing results by different assays

| Mutations                           | Variants        | NGS-based Avenio Expanded Panel |                 | MassARRAY-based UltraSEEK Lung Panel | qPCR-based Cobas <i>EGFR</i> Mutation Test |
|-------------------------------------|-----------------|---------------------------------|-----------------|--------------------------------------|--------------------------------------------|
|                                     |                 | VAF                             | CNV (Copies/mL) | Test result                          | Test result                                |
| <i>EGFR</i> sensitizing mutations   | Exon 21 p.L858R | 0.17%                           | 1.79            | Negative                             | Positive                                   |
|                                     | Exon 19 Dels    | 21.00%                          | 1590            | Inconclusive                         | NA                                         |
|                                     | Exon 19 Dels    | 0.11%                           | 89.1            | Negative                             | NA                                         |
|                                     | Exon 19 Dels    | 0.00%                           | 0               | Negative                             | Positive                                   |
| TKIs resistant <i>EGFR</i> mutation | Exon 20 p.T790M | 0.42%                           | 4.45            | Negative                             | Negative                                   |
|                                     | Exon 20 p.T790M | 0.00%                           | 0               | Positive                             | NA                                         |

142

143

144

145

146 **References**

- 147 1. Newman AM, Lovejoy AF, Klass DM, Kurtz DM, Chabon JJ, Scherer F, et al.  
148 Integrated digital error suppression for improved detection of circulating tumor DNA.  
149 Nat Biotechnol. 2016;34(5):547-55.
- 150 2. Newman AM, Bratman SV, To J, Wynne JF, Eclov NC, Modlin LA, et al. An  
151 ultrasensitive method for quantitating circulating tumor DNA with broad patient coverage.  
152 Nat Med. 2014;20(5):548-54.
- 153 3. Sutton BC, Birse RT, Maggert K, Ray T, Hobbs J, Ezenekwe A, et al. Assessment  
154 of common somatic mutations of EGFR, KRAS, BRAF, NRAS in pulmonary non-small  
155 cell carcinoma using iPLEX(R) HS, a new highly sensitive assay for the MassARRAY(R)  
156 System. PLoS One. 2017;12(9):e0183715.

157
